# Supplementary material for: Nanostructured manganese dioxide for anticancer applications: preparation, diagnosis, and therapy
Source: Royal Society of Chemistry journal article supplement (doi:10.1039/d0nr04067c), 2020-01-01
Supplement: d0nr04067c1.pdf [file d0nr04067c1.pdf]

## Supporting information

### **Nanostructured manganese dioxide for anticancer applications: preparation, diagnosis, and therapy**

Zheng Zhang, Yuanhui Ji\*

Jiangsu Province Hi-Tech Key Laboratory for Biomedical Research, School of Chemistry  
and Chemical Engineering, Southeast University, Nanjing, 211189, People's Republic of  
China

**\*Corresponding author:** E-mail: [yuanhui.ji@seu.edu.cn](mailto:yuanhui.ji@seu.edu.cn); [yuanhuijinj@163.com](mailto:yuanhuijinj@163.com)

**Table 1** Nanostructured MnO<sub>2</sub> for anticancer applications.

| MnO <sub>2</sub> type | Composition                                          | Synthetic method   | Size (nm)    | Enhance mode            | PDT Diagnostic mode | Loading drug    | Tumor type (cell)      | Advantage                                                  | Reference   |
|-----------------------|------------------------------------------------------|--------------------|--------------|-------------------------|---------------------|-----------------|------------------------|------------------------------------------------------------|-------------|
| Nanoparticle          | HCaM-PB                                              | Redox              | 192.1        | –                       | MRI/PA/FL           | HCPT            | Huh-7                  | Microenvironment- responsive DDS                           | [241], 2020 |
| Nanoparticle          | Ce6-GA@MnO <sub>2</sub> -HA-PEG                      | Redox              | 200          | Synergistically         | MRI/ FL             | Ce6             | HeLa                   | Self-boosting combined phototherapy                        | [137], 2020 |
| Nanoparticle          | mMnO <sub>2</sub>                                    | Redox              | 150.9        | –                       | MRI                 | AO              | H1299                  | Enhance Radiotherapy                                       | [78], 2020  |
| Nanoparticle          | Lipo-OGzyme-AIE                                      | Bio-mineralization | 122.5        | Generate O <sub>2</sub> | FL                  | AIE             | 4T1                    | Multi-modal imaging and improve PDT                        | [104], 2020 |
| Nanoparticle          | MPPF                                                 | Bio-mineralization | –            | –                       | FL                  | DOX             | SMMC-7721              | Chemo/chemodynamic co-therapy                              | [31], 2020  |
| Nanoparticle          | RGD-BMnNPs                                           | Bio-mineralization | 68           | –                       | MRI/ FL             | VEGFA-siRNA-Cy5 | U87MG                  | Tumor microenvironment modulation and enhance theranostics | [30], 2020  |
| Nanoparticle          | BSA-Ce6@IrO <sub>2</sub> /MnO <sub>2</sub>           | Bio-mineralization | 42 ± 3       | Generate O <sub>2</sub> | MRI/CT/PA/thermal   | Ce6             | MDA-MB-231/PC3/4T1     | Multimodal imaging-guided combination therapy              | [93], 2020  |
| Nanoparticle          | BSA@AuNCs-MnO <sub>2</sub>                           | Redox              | –            | –                       | FL                  | –               | HeLa                   | FL of intracellular GSH                                    | [25], 2020  |
| Nanoparticle          | TarA@bM                                              | Bio-mineralization | 60           | Generate O <sub>2</sub> | MRI/FL              | δ-ALA           | 4T1                    | Imaging-guided PDT                                         | [40], 2019  |
| Nanoparticle          | rMGB                                                 | Redox              | 85           | Generate O <sub>2</sub> | FL                  | BSA-Ce6         | 4T1                    | Against hypoxic for PDT                                    | [38], 2019  |
| Nanoparticle          | HMME@mMnO <sub>2</sub> -Apt                          | Redox              | 200          | Reduce GSH              | FL                  | HMME            | MCF-7                  | ROS regulator for photodynamic therapy                     | [131], 2019 |
| Nanoparticle          | M-Abx                                                | Redox              | 140          | –                       | FL                  | Abx             | 4T1                    | Oxygen-rich chemotherapy                                   | [68], 2019  |
| Nanoparticle          | BSA-Bi <sub>2</sub> S <sub>3</sub> -MnO <sub>2</sub> | Bio-mineralization | 50           | –                       | MRI/CT/PA           | –               | U14                    | Imaging-guided enhanced tumor therapy                      | [97], 2019  |
| Nanoparticle          | PEGylated HCMR                                       | Template           | –            | –                       | FL/thermal          | Rapa            | MDA-MB-231/MCF7/MGC803 | Efficient tumor ablation                                   | [79], 2019  |
| Nanoparticle          | HA-MnO <sub>2</sub>                                  | Redox              | 83           | –                       | MRI                 | –               | HUVECs/C6              | MRI and modulation of hypoxia                              | [82], 2019  |
| Nanoparticle          | NMOFs@BSA/SDs@MnO <sub>2</sub>                       | Bio-mineralization | 122          | Generate O <sub>2</sub> | MRI                 | Porphyrin       | 4T1                    | MRI and enhance PDT                                        | [99], 2019  |
| Nanoparticle          | PPIX-Lipo-MnO <sub>2</sub>                           | Redox              | 752.9 ± 50.7 | Generate O <sub>2</sub> | FL                  | PPIX            | MCF-7                  | Enhance PDT by improving hypoxia                           | [142], 2019 |
| Nanoparticle          | R-MnO <sub>2</sub> -FBP                              | Redox              | 30           | Generate O <sub>2</sub> | MRI/FL              | RhB             | HeLa                   | O <sub>2</sub> self-supply and PDT                         | [177], 2019 |
| Nanoparticle          | MnO <sub>2</sub> -mSiO <sub>2</sub> @Au-HA           | Redox              | 166.7        | –                       | MSOT/CT/            | –               | 4T1                    | Oxygen self-supply radiotherapy                            | [29], 2019  |
| Nanoparticle          | MnO <sub>2</sub> NP-CD                               | Redox              | 3.6          | –                       | FL                  | –               | SMMC-7721              | FL for cancer recognition                                  | [107], 2019 |
| Nanoparticle          | BSA-MnO <sub>2</sub> /Ce6@ZIF-8                      | Redox              | 227          | Generate O <sub>2</sub> | MRI/FL              | Ce6             | HeLa                   | Photosensitizer delivery system                            | [133], 2019 |

**Table 1** (Continued)

| MnO <sub>2</sub> type | Composition                                                     | Synthetic method   | Size (nm)   | Enhance PDT mode        | Diagnostic mode | Loading drug     | Tumor type (cell) | Advantage                                                       | Reference   |
|-----------------------|-----------------------------------------------------------------|--------------------|-------------|-------------------------|-----------------|------------------|-------------------|-----------------------------------------------------------------|-------------|
| Nanoparticle          | <sup>131</sup> I-rGO-MnO <sub>2</sub> -PEG                      | Redox              | –           | –                       | MRI             | <sup>131</sup> I | 4T1               | Overcome hypoxia for radioisotope therapy[71], 2018             |             |
| Nanoparticle          | PMHNS                                                           | Bio-mineralization | 7.0-60.9    | –                       | MRI/            | –                | HeLa/MCF-7/ 4T1   | Integration of polymerization and                               | [101], 2018 |
| Nanoparticle          | BSA-Ce6-Si-MnO <sub>2</sub>                                     | Bio-mineralization | 15          | Generate O <sub>2</sub> | MRI/FL          | Ce6              | HeLa/HepG-2       | FL imaging-guided PDT                                           | [81],2018   |
| Nanoparticle          | HSA-MnO <sub>2</sub> -Ce6                                       | Redox              | 118.6±8.1   | Generate O <sub>2</sub> | NIR/MRI/FL      | Ce6              | MB-49             | O <sub>2</sub> -generating MnO <sub>2</sub> for enhanced PDT    | [100], 2018 |
| Nanoparticle          | p-MoS <sub>2</sub> /n-rGO-MnO <sub>2</sub> -PEG                 | Redox              | 170         | Generate O <sub>2</sub> | FL              | –                | HeLa              | Enhance PDT                                                     | [178], 2018 |
| Nanoparticle          | AS1411/Ce6-LPMSNs-MnO <sub>2</sub>                              | Redox              | 179         | Generate O <sub>2</sub> | MRI             | Ce6              | HeLa              | PDT and MRI                                                     | [140], 2018 |
| Nanoparticle          | F127-MnO <sub>2</sub> -ZIF-8@ DOX/C <sub>3</sub> N <sub>4</sub> | Redox              | 78.5        | Generate O <sub>2</sub> | FL              | DOX              | 4T1               | Chemo-photodynamic therapy                                      | [129], 2018 |
| Nanoparticle          | ACF@MnO <sub>2</sub>                                            | Redox              | 30          | –                       | MRI             | –                | CT26              | Enhance radiation therapy                                       | [85], 2018  |
| Nanoparticle          | PEG-CuS-Au-MnO <sub>2</sub>                                     | Redox              | 162         | –                       | CT/MRI          | CST              | HepG2             | Imaging-guided chemo-PTT                                        | [208], 2018 |
| Nanoparticle          | PMAA <sub>BACy</sub> /DOX/MnO <sub>2</sub> -2/PEG               | Bio-mineralization | 124         | –                       | MRI             | DOX              | HeLa              | Low premature release and MRI                                   | [108], 2018 |
| Nanoparticle          | BSA-MnO <sub>2</sub> -DOX                                       | Redox              | 165.5 ± 3.0 | –                       | MRI/FL          | DOX              | MCF-7/ADR         | Drug vehicle and MRI contrast agent                             | [194], 2017 |
| Nanoparticle          | BSA-MnO <sub>2</sub>                                            | Redox              | 8.7         | –                       | MRI             | PTX/ICG          | 4T1               | A smart nanoprobes                                              | [138], 2017 |
| Nanoparticle          | BSA-Au-MnO <sub>2</sub>                                         | Bio-mineralization | 60          | –                       | FL              | –                | 4T1               | Enhance radiotherapy                                            | [98], 2017  |
| Nanoparticle          | BM@NCP(DSP)-PEG                                                 | Bio-mineralization | 160         | –                       | MRI/FL          | DSP              | 4T1               | Redox/pH/H <sub>2</sub> O <sub>2</sub> -responsive nanoplatform | [225], 2017 |
| Nanoparticle          | <sup>131</sup> I-HSA-MnO <sub>2</sub>                           | Bio-mineralization | 40          | –                       | FL/ PA          | –                | 4T1               | Enhanced radioisotope therapy                                   | [226], 2017 |
| Nanoparticle          | Ce6@MnO <sub>2</sub> -PEG                                       | Redox              | 100         | Generate O <sub>2</sub> | MRI/FL          | Ce6              | 4T1               | Modulation of hypoxia to enhance PDT                            | [174], 2016 |
| Nanoparticle          | HSA-MnO <sub>2</sub> -Ce6&Pt                                    | Bio-mineralization | 50          | Generate O <sub>2</sub> | FL              | Ce6/cis-Pt       | 4T1               | Modulate hypoxia for combination therapy                        | [103], 2016 |
| Nanoparticle          | Man-HA-MnO <sub>2</sub>                                         | Redox              | 203 ± 4.6   | –                       | MRI             | DOX              | 4T1               | Alleviate hypoxia                                               | [27], 2016  |
| Nanoparticle          | A-MnO <sub>2</sub>                                              | Redox              | 50          | –                       | FL              | –                | EMT6              | Modulate microenvironment                                       | [37], 2014  |
| Nanosheet             | MNS-GOx                                                         | Biomimetic method  | ~ 70        | –                       | NIR/PA/FL       | GOx              | A375              | Enhanced cancer starvation therapy                              | [189], 2020 |
| Nanosheet             | PEG-MnO <sub>2</sub> -OPN siRNA                                 | Redox              | –           | –                       | MRI             | siRNA            | 786-O             | Molecular imaging and DDS                                       | [230], 2020 |
| Nanosheet             | MnO <sub>2</sub>                                                | Hydrothermal       | 200         | –                       | MRI/FL/ PAI     | –                | HeLa              | Vacancy-driven photothermal therapy                             | [41], 2019  |
| Nanosheet             | MPPa-DP                                                         | Redox              | 212.5       | Generate O <sub>2</sub> | FL              | PPa-DP           | 4T1               | Retard O <sub>2</sub> consumption for oxygenated                | [65], 2019  |
| Nanosheet             | WSSe/MnO <sub>2</sub> -INH-TPP@CM                               | Redox              | 200         | –                       | MRI/CT          | TPP/INH          | MCF-7             | Synergistic anticancer treatment                                | [124], 2019 |

**Table 1** (Continued)

| MnO <sub>2</sub> type | Composition                                        | Synthetic method   | Size (nm)    | Enhance PDT mode        | Diagnostic mode           | Loading drug               | Tumor type (cell)      | Advantage                                                   | Reference   |
|-----------------------|----------------------------------------------------|--------------------|--------------|-------------------------|---------------------------|----------------------------|------------------------|-------------------------------------------------------------|-------------|
| Nanosheet             | PTX-MnO <sub>2</sub> /FCN                          | Redox              | 189          | –                       | FL                        | PTX                        | MDA-MB-231             | Bioimaging and smart DDS                                    | [212], 2019 |
| Nanosheet             | P-AgNCs-MnO <sub>2</sub>                           | Redox              | –            | Generate O <sub>2</sub> | Zn <sup>2+</sup> /FL/ MRI | Porphyrin                  | MCF-7                  | Zn <sup>2+</sup> /FL/MRI guided PDT                         | [221], 2019 |
| Nanosheet             | MnO <sub>2</sub> -PEG-cRGD                         | Redox              | 271 ± 26.7   | Generate O <sub>2</sub> | FL                        | Ce6                        | PC3                    | Synergistic photothermal/ PDT                               | [151], 2019 |
| Nanosheet             | CM-MMNPs                                           | Redox              | 160          | Generate O <sub>2</sub> | FL                        | –                          | HeLa/HepG2             | O <sub>2</sub> -evolving photodynamic therapy               | [136], 2019 |
| Nanosheet             | MnO <sub>2</sub> /ZnCOF@Au&BSA                     | Redox              | –            | –                       | FL                        | –                          | HepG2                  | Imaging and photothermal therapy                            | [148], 2019 |
| Nanosheet             | FA-CM                                              | Redox              | 130          | –                       | FL                        | DOX/PTX                    | HepG2/PC3/<br>SMMC7721 | Nanocarrier for cancer therapy                              | [152], 2019 |
| Nanosheet             | MnO <sub>2</sub> -Pt@Au <sub>25</sub>              | Redox              | –            | Synergistically         | MRI/FL                    | Au <sub>25</sub> /Pt(IV)   | HeLa                   | Promot PDT and chemotherapy                                 | [171], 2019 |
| Nanosheet             | MnO <sub>2</sub> @AS1411T <sub>33</sub> /TMPipEOPP | Redox              | 230          | Synergistically         | FL                        | G-quadruplex/<br>TMPipEOPP | HeLa                   | A Photosensitizer for promoting absorption redshift and PDT | [180], 2019 |
| Nanosheet             | QD@SiO <sub>2</sub> -MnO <sub>2</sub>              | Redox              | 222.5 ± 43.6 | –                       | FL                        | –                          | RAW264.7               | Biocompatible fluorescent nanoprobe                         | [201], 2019 |
| Nanosheet             | MnO <sub>2</sub>                                   | Redox              | –            | –                       | FL                        | DNAzyme                    | HeLa                   | High sensitivity nanoprobe                                  | [144], 2019 |
| Nanosheet             | IR780-sMnO <sub>2</sub> -PCM                       | Redox              | 140          | Generate O <sub>2</sub> | FL/PA                     | IR780                      | HeLa/A2780/<br>HCCLM3  | Hypoxia modulation and enhanced PTT                         | [128], 2019 |
| Nanosheet             | MPDA-WS <sub>2</sub> @MnO <sub>2</sub>             | Redox              | ~235.4       | –                       | CT/MSOT/MRI               | WS <sub>2</sub>            | 4T1                    | Thermoradiotherapy of hypoxic cancer                        | [132], 2019 |
| Nanosheet             | MnO <sub>2</sub>                                   | Redox              | 200-700      | –                       | –                         | –                          | –                      | Dual-signal responsive optical sensor                       | [211], 2019 |
| Nanosheet             | iOCOM                                              | Redox              | –            | –                       | MRI/FL                    | –                          | KB                     | Image-guided photothermal therapy                           | [208], 2019 |
| Nanosheet             | M-NS                                               | Bio-mineralization | 105.4 ± 11.7 | –                       | Thermographic/<br>PET/PA  | –                          | U87MG                  | Synergistic catalysis- enhanced phototheranostics           | [210], 2019 |
| Nanosheet             | MnO <sub>2</sub>                                   | –                  | 40-150       | –                       | FL                        | Ce6                        | TNBC/HeLa/<br>MCF-7    | 2D glycoclusters for the targeted delivery                  | [219], 2019 |
| Nanosheet             | Ru(BPY) <sub>3</sub> @MnO <sub>2</sub>             | Redox              | 50           | –                       | MRI/FL                    | –                          | HeLa                   | MRI nanoprobe                                               | [198], 2018 |
| Nanosheet             | WCNO-MnO <sub>2</sub>                              | Redox              | –            | –                       | FL                        | –                          | 4T1                    | Multichannel fluorescent nanoprobe                          | [202], 2018 |
| Nanosheet             | MnO <sub>2</sub> /PTX-loaded C-FNP                 | Redox              | 250          | –                       | FL                        | PTX                        | HeLa/ MDA-<br>MB-231   | Tumor-targeted drug delivery                                | [42], 2018  |

**Table 1** (Continued)

| MnO <sub>2</sub> type | Composition                                    | Synthetic method   | Size (nm)  | Enhance PDT mode        | Diagnostic mode             | Loading drug | Tumor type (cell) | Advantage                                     | Reference   |
|-----------------------|------------------------------------------------|--------------------|------------|-------------------------|-----------------------------|--------------|-------------------|-----------------------------------------------|-------------|
| Nanosheet             | GQD@MnO <sub>2</sub>                           | Redox              | –          | Reduce GSH              | FL                          | GQDs         | HeLa              | Imaging and enhance PDT                       | [56], 2018  |
| Nanosheet             | MnO <sub>2</sub> -SP                           | Exfoliation        | 255.0      | –                       | MRI                         | –            | 4T1               | Ultrathin MnO <sub>2</sub> nanosheets for PTT | [235], 2018 |
| Nanosheet             | MnO <sub>2</sub>                               | Redox              | 50-160     | –                       | MRI/FL                      | ssDNA        | CEM/Ramos         | Dual-modal amplification detection system     | [213], 2018 |
| Nanosheet             | HMSNs@MnO <sub>2</sub> (DOX)/apt               | Redox              | 248 ± 15   | –                       | MRI/FL                      | DOX          | HeLa              | Drug release and enhance MRI                  | [74], 2018  |
| Nanosheet             | MnO <sub>2</sub> /Cu <sub>2</sub> -xS          | Redox              | 49.2       | Generate O <sub>2</sub> |                             | siRNA        | A549              | Photothermal/photodynamic therapy             | [228], 2018 |
| Nanosheet             | UCNPs@MnO <sub>2</sub>                         | Redox              | –          | –                       | Photo-thermal imaging/FI/MR | DOX          | CEM/HeLa/Ramos    | Activatable FL imaging and MRI                | [203], 2018 |
| Nanosheet             | Au NCs-MnO <sub>2</sub>                        | Bio-mineralization | 50-100     | –                       | MRI/FL                      | –            | 4T1/HeLa          | Fluorometric/magnetic bimodal sensing         | [210], 2018 |
| Nanosheet             | UCNPs@mSiO <sub>2</sub> (DOX)-MnO <sub>2</sub> | Redox              | –          | –                       | MRI/FL                      | DOX          | HeLas             | Double-model guidedchemotherapy               | [216], 2018 |
| Nanosheet             | CDs/MnO <sub>2</sub> -PEG                      | Redox              | 180        | Generate O <sub>2</sub> | MRI                         | CDs          | HeLa              | Imaging-guided PDT                            | [73], 2018  |
| Nanosheet             | Co-P@mSiO <sub>2</sub> @DOX-MnO <sub>2</sub>   | Redox              | 286.6      | –                       | MRI                         | DOX          | 4T1               | Synergistic therapy                           | [193], 2017 |
| Nanosheet             | SPN-Ms                                         | Redox              | 40-76      | Generate O <sub>2</sub> | FL                          | –            | 4T1               | Oxygenic nanoparticles for PDT                | [176], 2017 |
| Nanosheet             | MCAD                                           | Redox              | 223        | –                       | MRI/FL                      | DOX          | 4T1/RAW264.7      | Bifunctional nanomodulator                    | [218], 2017 |
| Nanosheet             | UCNPs@TiO <sub>2</sub> @MnO <sub>2</sub>       | Redox              | –          | Generate O <sub>2</sub> | MRI/FL/CT                   | –            | 4T1               | O <sub>2</sub> self-supplementing for PDT     | [175], 2017 |
| Nanosheet             | MnO <sub>2</sub> /DVDMS                        | Redox              | 91.2       | Synergistically         | MRI/FL/PA                   | DVDMS        | MCF-7             | Nanotheranostic generator for PTT             | [181], 2017 |
| Nanosheet             | MnO <sub>2</sub> nanozyme                      | Redox              | 100-250    | –                       | FL                          | DNAzyme      | MCF-7/HeLa        | Catalytic DNA circuit generator               | [209], 2017 |
| Nanosheet             | MSU/MnO <sub>2</sub> -CR                       | Redox              | –          | –                       | –                           | CR dye       | –                 | Drug carrier for controlled release           | [215],2014  |
| Nanoshell             | TAT-Pd@Au@Ce6/ PAH/H-MnO <sub>2</sub>          | Template           | –          | Generate O <sub>2</sub> | FL                          | Ce6          | MCF-7/A549        | Photothermal and hypoxia-relieved PDT         | [120], 2020 |
| Nanoshell             | Ce6/iPMC-MnO <sub>2</sub>                      | Redox              | –          | Generate O <sub>2</sub> | MRI/PAI                     | Ce6          | 4 T1              | Multimodal diagnosis and treatment            | [69], 2020  |
| Nanoshell             | PLTM-HMnO <sub>2</sub> @Bu                     | Template           | 187        | –                       | MRI/FL                      | bufalin      | H22               | MRI-guided chemo- chemodynamic                | [122], 2020 |
| Nanoshell             | Protein@MnO <sub>2</sub>                       | Bio-mineralization | 90.3 ± 6.2 | –                       | MRI/FL                      | H39GFP       | HCT116            | Efficient vehicle for protein delivery        | [109], 2020 |
| Nanoshell             | FHHPM@MnO <sub>2</sub>                         | Redox              | 208.8      | Synergistically         | MRI/CT/F                    | MB           | 4T1/Hela          | Multimode imaging guided chemo-PDT            | [135], 2020 |
| Nanoshell             | aMMTm                                          | Redox              | 178.4      | Reduce GSH              | MRI/FL                      | Apatinib     | 4T1               | Antiangiogenesis and PDT                      | [169],2019  |
| Nanoshell             | PMLR                                           | Template           | –          | –                       | MRI                         | 3PO/LOX      | B16F10            | Metabolic therapy and immunotherapy           | [231], 2019 |
| Nanoshell             | CuS <sub>NC</sub> @DOX@MnO <sub>2</sub> -NS    | Redox              | 89         | –                       | MRI/FL                      | DOX          | HepG2             | Imaging-guided chemical and PTT               | [207], 2019 |

**Table 1** (Continued)

| MnO <sub>2</sub> type | Composition                                                           | Synthetic method | Size (nm) | Enhance PDT mode        | Diagnostic mode                   | Loading drug         | Tumor type (cell) | Advantage                               | Reference   |
|-----------------------|-----------------------------------------------------------------------|------------------|-----------|-------------------------|-----------------------------------|----------------------|-------------------|-----------------------------------------|-------------|
| Nanoshell             | H-MnO <sub>2</sub> -GOx-Ce6@C                                         | Template         | 75        | Generate O <sub>2</sub> | MRI/FL                            | Ce6                  | B16-F10           | Photodynamic-starvation therapy         | [67], 2019  |
| Nanoshell             | Lipo/HMME/ACF@MnO <sub>2</sub> -AS1411                                | Redox            | 178.7±3.1 | –                       | MRI/FL                            | HMME/ACF             | SKOV-3            | Synergistic enhance sonodynamic therapy | [85], 2018  |
| Nanoshell             | Cu <sub>2-x</sub> Se@MnO <sub>2</sub>                                 | Redox            | 60        | –                       | MRI                               | –                    | CT26              | MRI theranostic platform                | [150], 2018 |
| Nanoshell             | Fe <sub>5</sub> C <sub>2</sub> -GOD@MnO <sub>2</sub>                  | Redox            | 37.8      | –                       | MRI                               | –                    | HeLa              | Nanocatalysts for enhanced ablation     | [204], 2018 |
| Nanoshell             | PLGA/HMME@MnO <sub>2</sub>                                            | Redox            | 209.8     | Synergistically         | MRI/FL                            | HMME                 | MCF-7             | MRI and enhance PDT                     | [60], 2017  |
| Nanoshell             | H-MnO <sub>2</sub> -PEG/C&D                                           | Template         | –         | Generate O <sub>2</sub> | MRI/FL                            | Ce6/DOX              | 4T1               | Antitumor immune responses              | [121], 2017 |
| Nanoshell             | SiO <sub>2</sub> -MB@MnO <sub>2</sub>                                 | Redox            | 330       | Generate O <sub>2</sub> | MRI                               | MB                   | HeLa              | Overcoming hypoxia and MRI              | [77], 2017  |
| Nanotube              | Ab <sub>2</sub> -Co <sub>3</sub> O <sub>4</sub> @MnO <sub>2</sub> -Th | Hydrothermal     | 400-600   | –                       | –                                 | AFP/antibody         | –                 | Detection of alpha fetoprotein          | [214], 2018 |
| Nanoflower            | FHCPC@MnO <sub>2</sub>                                                | Redox            | 290       | Generate O <sub>2</sub> | MRI/CT/FL                         | Ce6                  | HeLa              | Microenvironment-responsive platform    | [126], 2019 |
| Nanoflower            | MnO <sub>2</sub> @PtCo                                                | Redox            | 200       | –                       | FL                                | PtCo nanozyme        | 4T1               | Nanozymes to against hypoxic            | [227], 2018 |
| Honeycomb             | Fol-DNAzyme/Ce6/CAT/hMnO <sub>2</sub>                                 | Template         | 136       | Synergistically         | FL                                | Catalase/Ce6/DNAzyme | MCF-7             | Gene-silencing and PDT                  | [118], 2017 |
| Honeycomb             | hMnO <sub>2</sub> -DOX                                                | Template         | 93        | –                       | FL                                | DOX                  | HepG2             | GSH-triggered drug release              | [117], 2015 |
| Nanosphere            | ICG-HANP/MnO <sub>2</sub>                                             | Redox            | 239 ± 4.2 | Generate O <sub>2</sub> | FL/photoacoustic/<br>ultrasound   | ICG                  | SCC7              | Imaging guided PDT                      | [34], 2017  |
| Nanowire              | MnO <sub>2</sub>                                                      | Hydrothermal     | 14/700    | –                       | FL                                | Cu/Ag/VB             | –                 | Nanowires for fluorescent sensing       | [190], 2019 |
| Hydrangea             | MDSP                                                                  | Redox            | 54        | Generate O <sub>2</sub> | Photoacoustic/<br>photothermal/FL | aza-BODIPY/DOX       | HCT-116           | Multimodal imaging and therapy          | [222], 2019 |
